# Supplementary material for: Modelling the Evolution and Spread of HIV Immune Escape Mutants
Source: PubMed Central journal article supplement (PMC2987822; doi:10.1371/journal.ppat.1001196), 2010-11-18
Supplement: ppat.1001196.s001.pdf [file ppat.1001196.s001.pdf]

| HXB2 amino acid sequence | Author wildtype sequence if different to HXB2<br>B-clade ancestral sequence if different to HXB2 | Gene (HXB2 [S1]) | Amino acid location (HXB2 [S1]) | HLA            | Proportion of Caucasians with HLA [36] (p) | Escape mutations <sup>b</sup>                            | Reference                                                                                                                                         |
|--------------------------|--------------------------------------------------------------------------------------------------|------------------|---------------------------------|----------------|--------------------------------------------|----------------------------------------------------------|---------------------------------------------------------------------------------------------------------------------------------------------------|
| KIRLRPGGK                | -                                                                                                | p17 gag          | 18-26                           | A3             | 0.224                                      | K9R<br>K1R & K9R                                         | Wilson 1999 [S2], Sanchez-Merino 2005 [S3]<br>Wilson 1999 [S2]                                                                                    |
| RLRPGGKKK                | -                                                                                                | p17 gag          | 20-28                           | A3             | 0.224                                      | K9Q<br>K9T<br>K9R                                        | Allen 2004 [6]<br>Allen 2004 [6]<br>Geels 2003 [19]                                                                                               |
| GGKKKYKL                 | -                                                                                                | p17 gag          | 24-32                           | B8             | 0.143                                      | K3R<br>K5Q<br>K7R<br>K7Q<br>K5Q & K7R<br>K3R & K5T       | Reid 1996 [S4]<br>Price 1997 [3]<br>Reid 1996 [S4]<br>Reid 1996 [S4]<br>Milicic 2005 [S5]<br>Milicic 2005 [S5]                                    |
| KYKLKHIVW                | -                                                                                                | p17 gag          | 28-36                           | A24            | 0.196                                      | K1Q<br>K3R & I7L<br>K1R & K3R & I7L                      | Yokomaku 2004 [S6]<br>Yokomaku 2004 [S6]<br>Yokomaku 2004 [S6]                                                                                    |
| GSEELRSLY                | -                                                                                                | p17 gag          | 71-79                           | A1             | 0.262                                      | L5I & R6K<br>Y9F                                         | Milicic 2005 [S5]<br>Milicic 2005 [S5]                                                                                                            |
| SLYNTVATL                | -                                                                                                | p17 gag          | 77-85                           | A2             | 0.438                                      | Y3F<br>N4I<br>T5A<br>T5L<br>V6I<br>T8V<br>Y3H & T8V      | Jamieson 2003 [S7]<br>Brander 1998 [S8]<br>Brander 1999 [S9]<br>Brander 1998 [S8]<br>Geels 2006 [S10]<br>Jamieson 2003 [S7]<br>Jamieson 2003 [S7] |
| AADTGHSNQ <sup>a</sup>   | <a href="#">AADTGNSSQ</a><br><a href="#">AADTGNSSQ</a>                                           | p17 gag          | 119-127                         | Not determined |                                            | many<br>(see paper)                                      | Jones 2004 [S11]                                                                                                                                  |
| HSNQVSNQYP <sup>a</sup>  | <a href="#">NSSQVSNQYP</a><br><a href="#">NSSQVSNQYP</a>                                         | p17 gag          | 124-133                         | Not determined |                                            | many<br>(see paper)                                      | Jones 2004 [S11]                                                                                                                                  |
| ISPRTLNAW                | -                                                                                                | p24 gag          | 15-23                           | B57            | 0.057                                      | A(-1)P<br>I1M<br>I1L                                     | Draenert 2004 [S12]<br>Pillay 2005 [S13]<br>Pillay 2005 [S13]                                                                                     |
| KAFSPEVPMF               | -                                                                                                | p24 gag          | 30-40                           | B57            | 0.057                                      | A2G                                                      | Crawford 2007 [S14]                                                                                                                               |
| EVIPMFSAL                | -                                                                                                | p24 gag          | 35-43                           | A26            | 0.083                                      | E1K<br>S7A<br>S7T                                        | Kawashima 2005 [S15]<br>Kawashima 2005 [S15]<br>Kawashima 2005 [S15]                                                                              |
| TSTLQEQIGW               | <a href="#">HXB2 and TSTLQEQIAGW</a>                                                             | p24 gag          | 108-117                         | B57/B58        | 0.096                                      | T3N                                                      | Leslie 2004 [17], Allen 2004 [6],<br>Feeney 2005 [S16], Pillay 2005 [S13]                                                                         |
| KRWILGLNK                | -                                                                                                | p24 gag          | 131-140                         | B27            | 0.073                                      | R2K<br>R2G<br>R2Q                                        | Kelleher 2001 [20], Goulder 1997 [8],<br>Geels 2006 [S10]<br>Kelleher 2001 [20]<br>Ammarmond 2005 [S17]                                           |
| NANPDCKTI                | -                                                                                                | p24 gag          | 193-201                         | B51            | 0.126                                      | A2S & T8N                                                | Yokomaku 2004 [S6]                                                                                                                                |
| DCKTILKAL                | -                                                                                                | p24 gag          | 197-205                         | B8             | 0.143                                      | K3R                                                      | Nowak 1995 [21]                                                                                                                                   |
| CGKEGHTAR                | <a href="#">CGKEGHAR</a><br><a href="#">CGKEGHAR</a>                                             | p7 gag           | 32-40                           | A31            | 0.050                                      | R9K                                                      | Goonetilleke 2009 [5]                                                                                                                             |
| GPVKVQWPL                | -                                                                                                | RT               | 18-26                           | B8             | 0.143                                      | K3R<br>K3E                                               | Meier 1995 [S18]<br>Meier 1995 [S18]                                                                                                              |
| TAFTIPSI                 | -                                                                                                | RT               | 128-135                         | B51            | 0.126                                      | I8T                                                      | Geels 2006 [S10]                                                                                                                                  |
| AIFQSSMTK                | -                                                                                                | RT               | 158-166                         | A3/A11         | 0.340                                      | Q4L<br>A1T & F3S                                         | Wilson 1999 [S2]<br>Wilson 1999 [S2]                                                                                                              |
| IVLPEKDSW                | -                                                                                                | RT               | 244-252                         | B57            | 0.057                                      | V2M<br>V2T<br>D7G                                        | Menendez-Arias 1998 [S19]<br>Menendez-Arias 1998 [S19]<br>Menendez-Arias 1998 [S19]                                                               |
| IPLTEEAEL <sup>3</sup>   | <a href="#">VPLTEEAEL</a>                                                                        | RT               | 293-301                         | B57            | 0.057                                      | E5V<br>E5A<br>E5G                                        | Oxenius 2004 [S20]                                                                                                                                |
| ETFYVDGAANR <sup>a</sup> | -                                                                                                | RT               | 438-448                         | A26            | 0.083                                      | F3Y & D6N                                                | Wilson 1999 [S2]                                                                                                                                  |
| QVPLRPMTYK               | -                                                                                                | nef              | 73-82                           | A3/A11         | 0.340                                      | V2A<br>L4A<br>R5A<br>M7A<br>T8A                          | Milicic 2005 [S5]<br>Keonig 1995 [S21]<br>Keonig 1995 [S21]<br>Keonig 1995 [S21]<br>Keonig 1995 [S21]                                             |
| VPLRPMTY                 | -                                                                                                | nef              | 74-81                           | B35            | 0.196                                      | T7S<br>Y8F                                               | Oxenius 2004 [S20]<br>Oxenius 2004 [S20]                                                                                                          |
| RPMTYKAAV                | <a href="#">RPMTYKGAAL</a><br><a href="#">RPMTYKAAAL</a>                                         | nef              | 77-85                           | B7             | 0.166                                      | T4S<br>Y5F                                               | Oxenius 2004 [S20]<br>Oxenius 2004 [S20]                                                                                                          |
| KAVDLSHF                 | <a href="#">KAALDLSHF</a>                                                                        | nef              | 82-90                           | B57/B58        | 0.096                                      | A2G                                                      | Leslie 2005 [S22]                                                                                                                                 |
| FLKEKGGL                 | -                                                                                                | nef              | 90-97                           | B8             | 0.143                                      | E4D<br>K5N<br>K5E<br>L2I & K5N<br>K3E & K5N<br>E4G & K5N | Price 1997 [3]<br>Price 1997 [3]<br>Price 1997 [3]<br>Price 1997 [3]<br>Price 1997 [3]<br>Price 1997 [3]                                          |
| HTQGYFPDW                | -                                                                                                | nef              | 116-125                         | B57            | 0.057                                      | H1N                                                      | Pillay 2005 [S13]                                                                                                                                 |
| TPGPGVRYPL               | <a href="#">TPGPGIRYPL</a>                                                                       | nef              | 128-137                         | B42/B7         | 0.169                                      | P2S<br>P2Q                                               | Pillay 2005 [S13]<br>Pillay 2005 [S13]                                                                                                            |
| RYPLTFGWY                | <a href="#">RYPLTFGWCF</a><br><a href="#">RYPLTFGWCF</a>                                         | nef              | 134-143                         | A24            | 0.196                                      | Y2F                                                      | Furutsuki 2004 [S23]                                                                                                                              |
| SRLAFHHVAR <sup>a</sup>  | <a href="#">SRLAFHHMAR</a><br><a href="#">SSLAFHHVAR</a>                                         | nef              | 187-196                         | A31            | 0.050                                      | R10Q                                                     | Goonetilleke 2009 [5]                                                                                                                             |

**Table S1. A summary of mutations in HIV-1 gag, RT and nef which have been reported in the literature as conferring CTL escape and confirmed by *in vitro* tests.**

In some cases the HBX2 epitope sequence differs from the author wildtype sequence and/or the B-clade ancestral sequence [S24]. These changes are shown in column 2. Note that we have not included in this list any defined escape mutations that lie in sites that differ between the author wildtype sequence and the B-clade ancestral sequence. Epitopes are ordered according to their location within the genome. The proportion of Caucasians with each HLA type is estimated from allele frequencies amongst Caucasians [36], assuming mendelian genetics. This calculation ignores linkage between alleles. <sup>a</sup>Epitopes AADTGHSNQ and HSNQVSQNYP are excluded from analysis of the cross-sectional data (dataset 2) and the longitudinal cohort data (dataset 4) because their HLA-restrictions were not determined. In addition, sequence data were not available from the cross-sectional study for IPLTEEAEL or SRLAFHHVAR or from the longitudinal cohort study for ETFYVDGAANR. Sequence data for CGKEGHTAR were available from neither study. <sup>b</sup>Where two or more different mutations are given together with the ‘&’ sign, it indicates that an epitope containing that combination of mutations was tested and found to confer escape.
