# Supplementary material for: Modelling the Evolution and Spread of HIV Immune Escape Mutants
Source: PubMed Central journal article supplement (PMC2987822; doi:10.1371/journal.ppat.1001196), 2010-11-18
Supplement: ppat.1001196.s003.pdf [file ppat.1001196.s003.pdf]

| HXB2 amino-acid sequence           | Author wildtype sequence if different to HXB2 | Gene (HXB2 [S1]) | Amino acid location (HXB2 [S1]) | HLA restriction | Escape mutations (away from author wildtype)         | Time between infection and escape <sup>a</sup> (years)                                              | Time between infection and last sample without escape (years) | Estimated average time to escape <sup>b</sup> (years <sup>-1</sup> ) | Number of patients | Number of patients with escape | Reference {number of patients per reference}                                                                    |
|------------------------------------|-----------------------------------------------|------------------|---------------------------------|-----------------|------------------------------------------------------|-----------------------------------------------------------------------------------------------------|---------------------------------------------------------------|----------------------------------------------------------------------|--------------------|--------------------------------|-----------------------------------------------------------------------------------------------------------------|
| RLRPGGKKK                          | -                                             | p17 gag          | 20-28                           | A3              | K9R, K9Q, K9T                                        | 1.15, 1.71 <sup>c</sup> , 2.15, 2.39 <sup>c</sup>                                                   |                                                               | 1.15                                                                 | 4                  | 4                              | Allen 2004 [6]{3}, Geels 2003 [19] {1}                                                                          |
| SLYNTVATL                          | -                                             | p17 gag          | 77-85                           | A2              | T8V, V6I                                             | 3.53, 4.38 <sup>c</sup> , 7.31, 8.50 <sup>c</sup>                                                   |                                                               | 3.53                                                                 | 4                  | 4                              | Jamieson 2003 [S7] {3}, Geels 2003 [19] {1}                                                                     |
| AADTGHSNQ                          | AADTG <u>N</u> SSQ                            | p17 gag          | 119-127                         | Not determined  | several (see paper)                                  | 0.25                                                                                                |                                                               | 0.25                                                                 | 1                  | 1                              | Jones 2004 [S11]                                                                                                |
| HSNQVSNYP                          | <u>N</u> SSQVSNYP                             | p17 gag          | 124-133                         | Not determined  | several (see paper)                                  | 0.39                                                                                                |                                                               | 0.39                                                                 | 1                  | 1                              | Jones 2004 [S11]                                                                                                |
| ISPRTLNAW                          |                                               | p24 gag          | 15-23                           | B57             | I1M, I1L                                             | 0.28, 0.41                                                                                          | 0.42                                                          | 0.41                                                                 | 3                  | 2                              | Pillay 2005 [S13] {1}, Goonetilleke 2009 [5] {2}                                                                |
| TSTLQEQIGW                         | TSTLQEQIGW<br>TSTLQEQI <u>A</u> W             | p24 gag          | 108-117                         | B57/B58         | T3N                                                  | 0.17, 0.35, 0.99, 1.00, 1.02, 1.60, 2.00 <sup>c</sup> , 2.50, 3.00 <sup>c</sup> , 5.50 <sup>c</sup> | 6.00                                                          | 1.00                                                                 | 11                 | 10                             | Leslie 2004 [6] {6}, Feeny 2005 [S16] {2}, Allen 2004 [6] {1}, Pillay 2005 [S13] {1}, Goonetilleke 2009 [5] {1} |
| KRWIILGLNK                         | -                                             | p24 gag          | 131-140                         | B27             | R2K, R2G                                             | 0.85, 3.78 <sup>c</sup> , 7.30, 7.96, 12.42                                                         | 0.90, 1.18, 1.28, 7.33, 9.90, 14.10, 14.50, 15.40             | 12.42                                                                | 13                 | 5                              | Goulder 1997 [8] & Kelleher 2001 [20] {5}, Kelleher 2001 [20] {6}, Goulder 1997 [8] {1}, Geels 2006 [S10] {1}   |
| CGKEGH <del>T</del> A <del>R</del> | CGKEGH <u>I</u> A <del>R</del>                | p7 gag           | 32-40                           | A31             | I7L, R9K                                             | 0.12                                                                                                |                                                               | 0.12                                                                 | 1                  | 1                              | Goonetilleke 2009 [5]                                                                                           |
| TAFTIPSI                           | -                                             | RT               | 128-135                         | B51             | I8T                                                  | 2.67                                                                                                |                                                               | 2.67                                                                 | 1                  | 1                              | Geels 2003 [19]                                                                                                 |
| IPLTEEAEL                          | -                                             | RT               | 293-301                         | B57             | E5V, E5A E5G                                         | 1.00                                                                                                |                                                               | 1.00                                                                 | 1                  | 1                              | Oxenius 2004 [S20]                                                                                              |
| VPLRPMTY                           | -                                             | nef              | 74-81                           | B35             | T7S, Y8F                                             | 1.50                                                                                                |                                                               | 1.50                                                                 | 1                  | 1                              | Oxenius 2004 [S20]                                                                                              |
| RPMTYKAAV                          | RPMTYK <u>G</u> AL                            | nef              | 77-85                           | B7              | T4S, Y5F                                             | 1.19                                                                                                |                                                               | 1.19                                                                 | 1                  | 1                              | Oxenius 2004 [S20]                                                                                              |
| KAAVDLSHF                          | -                                             | nef              | 82-90                           | B57/B58         | A2G                                                  | 0.28, 0.32, 0.68, 3.00 <sup>c</sup> , 2.00 <sup>c</sup>                                             |                                                               | 0.32                                                                 | 5                  | 5                              | Leslie 2005 [S22] {3}, Pillay 2005 [S13] {1}, Goonetilleke 2009 [5] {1}                                         |
| FLKEKGGL                           | -                                             | nef              | 90-97                           | B8              | K5N, K5E, E4D, (L2I & K5N), (K3E & K5N), (K4G & K5N) | 0.24                                                                                                |                                                               | 0.24                                                                 | 1                  | 1                              | Price 1997 [3]                                                                                                  |
| HTQGYFPDW                          | -                                             | nef              | 116-124                         | B57             | H1N                                                  | 0.35                                                                                                | 1.04                                                          | 0.35                                                                 | 2                  | 1                              | Pillay 2005 [S13] {1}, Goonetilleke 2009 [5] {1}                                                                |
| TPGPGVRYPL                         | -                                             | nef              | 128-137                         | B42             | P2S, P2Q                                             | 0.43                                                                                                |                                                               | 0.43                                                                 | 1                  | 1                              | Pillay 2005 [S13]                                                                                               |
| RYPLTFGW <del>C</del> Y            | RYPLTFGW <u>C</u> F                           | nef              | 134-143                         | A24             | Y2F                                                  | 0.25                                                                                                |                                                               | 0.25                                                                 | 1                  | 1                              | Sanchez-Merino 2005 [S3]                                                                                        |
| SRLAFHHVAR                         | <u>S</u> SLAFHHVAR                            | nef              | 187-196                         | A31             | S2N, R10Q                                            | 0.02                                                                                                |                                                               | 0.02                                                                 | 1                  | 1                              | Goonetilleke 2009 [5]                                                                                           |

| HXB2 amino-acid sequence | Author amino-acid sequence if different to HXB2 | HXB2 Gene | Amino acid location (HXB2) | HLA restriction | Escape mutation (away from author wildtype) | Time between infection and escape <sup>a</sup> (years) | Time between infection and last sample without escape (years) | Estimated average time to escape <sup>b</sup> (years) | Number of patients | Number of patients with escape | Reference (number of patients per reference)    |
|--------------------------|-------------------------------------------------|-----------|----------------------------|-----------------|---------------------------------------------|--------------------------------------------------------|---------------------------------------------------------------|-------------------------------------------------------|--------------------|--------------------------------|-------------------------------------------------|
| TEKLWVTVY                | <u>A</u> ENLWVTVY                               | env gp160 | 31-39                      | B44             | several (see paper)                         | 0.15                                                   |                                                               | 0.15                                                  | 1                  | 1                              | Jones 2004 [S11] & Borrow 1997 [2]              |
| DPNPQEVVL                | DPNPQEV <u>A</u> L                              | env gp160 | 78-86                      | B35             | A8P, V7A                                    | 0.76                                                   |                                                               | 0.76                                                  | 1                  | 1                              | Oxenius 2004 [S20]                              |
| SFEPIPIHY                | -                                               | env gp160 | 209-217                    | A29             | S1T, E4D, (F2I & Y9F)                       | 0.33                                                   | 2.19                                                          | 0.33                                                  | 2                  | 1                              | Jones 2004 [S11]                                |
| QFGNNTIIF                | <u>Q</u> FRN_YTIVF                              | env gp160 | 352-361                    | Cw4             | R3K                                         | 0.04                                                   |                                                               | 0.04                                                  | 1                  | 1                              | Goonetilleke 2009 [5]                           |
| SFNCGGEFF                | -                                               | env gp160 | 375-383                    | B15             | G5R                                         | 0.45                                                   |                                                               | 0.45                                                  | 1                  | 1                              | Geels 2003 [19]                                 |
| ERYLKDQQL                | -                                               | env gp160 | 584-592                    | B14             | K5T, K5Q, K5S, K5M, Y3H                     | 0.44, 0.48, 1.16                                       |                                                               | 0.69                                                  | 3                  | 3                              | Jones 2004 [S11] [2], Goonetilleke 2009 [5] [1] |
| EAVRHFPRI                | -                                               | vpr       | 29-37                      | B51             | I9T<br>I9L                                  | 0.42                                                   |                                                               | 0.42                                                  | 1                  | 1                              | Cao 2003 [S25]                                  |
| CCFHQVC                  | -                                               | tat       | 30-37                      | Cw12            | F3L<br>V7S                                  | 0.20                                                   | 0.91                                                          | 0.57                                                  | 2                  | 1                              | Cao 2003 [S25]                                  |
| NCYCKKCCF                | NCYCKKCCF<br>NCYCKKCC <u>Y</u>                  | tat       | 24-32                      | A29             | NIK<br>NIK & K6R<br>NIK & K6Q               | 0.16, 0.23                                             |                                                               | 0.19                                                  | 2                  | 2                              | Jones 2004 [S11]                                |
| FHCQVCFITK               | FHCQVCF <u>M</u> TK                             | tat       | 32-41                      | Not determined  | FIL & T9K                                   | 0.23                                                   |                                                               | 0.23                                                  | 1                  | 1                              | Jones 2004 [S11]                                |

**Table S3. A summary of published escape data from case reports (dataset 3).**

A summary of published data relating the appearance of escape mutants, as presented in Fig. 2C (dataset 3). Mutations are included in this summary if they have been described as conferring escape and confirmed *in vitro* somewhere in the published literature. Patient-epitope pairs are included if three conditions are met: 1) an estimate is provided for the infection date or time of seroconversion of the patient, 2) if the patient is HLA matched for the epitope in question and 3) if the patient has 0% escape mutant at the first sample. This table includes all of the 18 epitopes in Table S1 for which case report data of this specification are available. Note that unlike Table S1 this dataset is not restricted to epitopes in gag, RT and Nef. It includes data from an additional 10 epitopes with known escape mutations in env, vpr and tat. Epitopes are ordered according to their location within the genome. <sup>a</sup>For patient-epitope pairs for which escape mutants arose during the study period, the time between infection and escape is estimated using linear interpolation to be the first time-point at which 50% of the patient's sequences were mutant. Patients who were tracked from the time that they seroconverted were assumed to have become infected 30 days prior to seroconversion. <sup>b</sup>For each epitope the average time between infection and escape is estimated by summing across patients all the times to escape (column 7) and the times to the last sample without escape (column 8) and dividing by the number of patients in whom escape mutants occurred. <sup>c</sup>For patients in whom escape mutants occurred, if the time between the last sample without escape and the first sample with escape was more than 2 years the data were excluded from the analysis of the average time to escape.
