# Supplementary material for: Modelling the Evolution and Spread of HIV Immune Escape Mutants
Source: PubMed Central journal article supplement (PMC2987822; doi:10.1371/journal.ppat.1001196), 2010-11-18
Supplement: ppat.1001196.s006.pdf [file ppat.1001196.s006.pdf]

## Text S2. Supporting references

- S1. Korber BT, Foley BT, Kuiken CL, Pillai SK, Sodroski JG Numbering Positions in HIV Relative to HXB2CG. [www.hiv.lanl.gov/content/sequence/HIV/REVIEWS/HXB2](http://www.hiv.lanl.gov/content/sequence/HIV/REVIEWS/HXB2).
- S2. Wilson CC, Brown RC, Korber BT, Wilkes BM, Ruhl DJ, et al. (1999) Frequent detection of escape from cytotoxic T-lymphocyte recognition in perinatal human immunodeficiency virus (HIV) type 1 transmission: the ariel project for the prevention of transmission of HIV from mother to infant. *J Virol* 73: 3975-3985.
- S3. Sanchez-Merino V, Nie S, Luzuriaga K (2005) HIV-1-specific CD8+ T cell responses and viral evolution in women and infants. *J Immunol* 175: 6976-6986.
- S4. Reid SW, McAdam S, Smith KJ, Klenerman P, O'Callaghan CA, et al. (1996) Antagonist HIV-1 Gag peptides induce structural changes in HLA B8. *J Exp Med* 184: 2279-2286.
- S5. Milicic A, Edwards CT, Hue S, Fox J, Brown H, et al. (2005) Sexual transmission of single human immunodeficiency virus type 1 virions encoding highly polymorphic multisite cytotoxic T-lymphocyte escape variants. *J Virol* 79: 13953-13962.
- S6. Yokomaku Y, Miura H, Tomiyama H, Kawana-Tachikawa A, Takiguchi M, et al. (2004) Impaired processing and presentation of cytotoxic-T-lymphocyte (CTL) epitopes are major escape mechanisms from CTL immune pressure in human immunodeficiency virus type 1 infection. *J Virol* 78: 1324-1332.
- S7. Jamieson BD, Yang OO, Hultin L, Hausner MA, Hultin P, et al. (2003) Epitope escape mutation and decay of human immunodeficiency virus type 1-specific CTL responses. *J Immunol* 171: 5372-5379.
- S8. Brander C, Hartman KE, Trocha AK, Jones NG, Johnson RP, et al. (1998) Lack of strong immune selection pressure by the immunodominant, HLA-A\*0201-restricted cytotoxic T lymphocyte response in chronic human immunodeficiency virus-1 infection. *J Clin Invest* 101: 2559-2566.
- S9. Brander C, Yang OO, Jones NG, Lee Y, Goulder P, et al. (1999) Efficient processing of the immunodominant, HLA-A\*0201-restricted human immunodeficiency virus type 1 cytotoxic T-lymphocyte epitope despite multiple variations in the epitope flanking sequences. *J Virol* 73: 10191-10198.
- S10. Geels MJ, Jansen CA, Baan E, De Cuyper IM, van Schijndel GJ, et al. (2006) CTL escape and increased viremia irrespective of HIV-specific CD4+ T-helper responses in two HIV-infected individuals. *Virology* 345: 209-219.
- S11. Jones NA, Wei X, Flower DR, Wong M, Michor F, et al. (2004) Determinants of human immunodeficiency virus type 1 escape from the primary CD8+ cytotoxic T lymphocyte response. *J Exp Med* 200: 1243-1256.
- S12. Draenert R, Allen TM, Liu Y, Wrin T, Chappey C, et al. (2006) Constraints on HIV-1 evolution and immunodominance revealed in monozygotic adult twins infected with the same virus. *J Exp Med* 203: 529-539.
- S13. Pillay T, Zhang HT, Drijfhout JW, Robinson N, Brown H, et al. (2005) Unique acquisition of cytotoxic T-lymphocyte escape mutants in infant human immunodeficiency virus type 1 infection. *J Virol* 79: 12100-12105.
- S14. Crawford H, Prado JG, Leslie A, Hue S, Honeyborne I, et al. (2007) Compensatory mutation partially restores fitness and delays reversion of escape mutation within

- the immunodominant HLA-B\*5703-restricted Gag epitope in chronic human immunodeficiency virus type 1 infection. *J Virol* 81: 8346-8351.
- S15. Kawashima Y, Satoh M, Oka S, Takiguchi M (2005) Identification and characterization of HIV-1 epitopes presented by HLA-A\*2603: comparison between HIV-1 epitopes presented by A\*2601 and A\*2603. *Hum Immunol* 66: 1155-1166.
- S16. Feeney ME, Tang Y, Pfafferott K, Roosevelt KA, Draenert R, et al. (2005) HIV-1 viral escape in infancy followed by emergence of a variant-specific CTL response. *J Immunol* 174: 7524-7530.
- S17. Ammaranond P, Zaunders J, Satchell C, van Bockel D, Cooper DA, et al. (2005) A new variant cytotoxic T lymphocyte escape mutation in HLA-B27-positive individuals infected with HIV type 1. *AIDS Res Hum Retroviruses* 21: 395-397.
- S18. Meier UC, Klenerman P, Griffin P, James W, Koppe B, et al. (1995) Cytotoxic T lymphocyte lysis inhibited by viable HIV mutants. *Science* 270: 1360-1362.
- S19. Menendez-Arias L, Mas A, Domingo E (1998) Cytotoxic T-lymphocyte responses to HIV-1 reverse transcriptase (review). *Viral Immunol* 11: 167-181.
- S20. Oxenius A, Price DA, Trkola A, Edwards C, Gostick E, et al. (2004) Loss of viral control in early HIV-1 infection is temporally associated with sequential escape from CD8+ T cell responses and decrease in HIV-1-specific CD4+ and CD8+ T cell frequencies. *J Infect Dis* 190: 713-721.
- S21. Koenig S, Conley AJ, Brewah YA, Jones GM, Leath S, et al. (1995) Transfer of HIV-1-specific cytotoxic T lymphocytes to an AIDS patient leads to selection for mutant HIV variants and subsequent disease progression. *Nat Med* 1: 330-336.
- S22. Leslie A, Kavanagh D, Honeyborne I, Pfafferott K, Edwards C, et al. (2005) Transmission and accumulation of CTL escape variants drive negative associations between HIV polymorphisms and HLA. *J Exp Med* 201: 891-902.
- S23. Furutsuki T, Hosoya N, Kawana-Tachikawa A, Tomizawa M, Odawara T, et al. (2004) Frequent transmission of cytotoxic-T-lymphocyte escape mutants of human immunodeficiency virus type 1 in the highly HLA-A24-positive Japanese population. *J Virol* 78: 8437-8445.
- S24. Cooper LJ, Wacker DP, McComas JJ, Brown K, Peck SM, et al. (1995) Use of component analyses to identify active variables in treatment packages for children with feeding disorders. *J Appl Behav Anal* 28: 139-153.
- S25. Cao J, McNevin J, Malhotra U, McElrath MJ (2003) Evolution of CD8+ T cell immunity and viral escape following acute HIV-1 infection. *J Immunol* 171: 3837-3846.
- S26. Frahm N, Baker B, Brander C (2008) Identification and optimal definition of HIV-derived cytotoxic T lymphocyte (CTL) epitopes for the study of CTL escape, functional avidity and viral evolution. Los Alamos HIV molecular immunology database.
- S27. Janeway CA, Travers P, Walport M, Shlomchik MJ (2004) *Immunobiology*: Garland Science Publishing.
- S28. Fideli US, Allen SA, Musonda R, Trask S, Hahn BH, et al. (2001) Virologic and immunologic determinants of heterosexual transmission of human immunodeficiency virus type 1 in Africa. *AIDS Res Hum Retroviruses* 17: 901-910.

S29. Operskalski EA, Stram DO, Busch MP, Huang W, Harris M, et al. (1997) Role of viral load in heterosexual transmission of human immunodeficiency virus type 1 by blood transfusion recipients. Transfusion Safety Study Group. *Am J Epidemiol* 146: 655-661.
