# Supplementary material for: Modelling the Evolution and Spread of HIV Immune Escape Mutants
Source: PLOS journal article supplement (doi:10.1371/journal.ppat.1001196), 2010-11-18
Supplement: S2 (10.1371/journal.ppat.1001196.s002) [file journal.ppat.1001196.s002]

| HXB2 Amino Acid sequence | Escape site            | Cross-sectional study (dataset 2) |                            |                                  |                                     | Longitudinal cohort study (dataset 4) |                            |                                  |                                     |
|--------------------------|------------------------|-----------------------------------|----------------------------|----------------------------------|-------------------------------------|---------------------------------------|----------------------------|----------------------------------|-------------------------------------|
|                          |                        | HLA matched with escape           | HLA mismatched with escape | Estimated time to escape (years) | Estimated time to reversion (years) | HLA matched with escape               | HLA mismatched with escape | Estimated time to escape (years) | Estimated time to reversion (years) |
| KIRLRPGGK                | K1, K9                 | 4/14                              | 7/32                       | 23.9                             | No rev                              | 3/14                                  | 2/38                       | 10.5                             | 36.4                                |
| RLRPGGKKK                | K9                     | 8/14                              | 5/32                       | 4.42                             | 5.66                                | 5/10                                  | 7/45                       | 2.15                             | 13.0                                |
| GGKKKYKL                 | K3, K5, K7             | 6/7                               | 28/39                      | 1.64                             | No rev                              | 2/7                                   | 4/101                      | 4.13                             | >50                                 |
| KYKLGKHIW                | K1, K3, I7             | 8/9                               | 26/37                      | 1.76                             | No rev                              | 5/5                                   | 4/106                      | 0.75                             | >50                                 |
| GSEELRSLY                | L5, R6, Y9             | 10/11                             | 24/35                      | 1.73                             | >50                                 | 4/7                                   | 2/91                       | 2.38                             | >50                                 |
| SLYNTVATL                | Y3, N4, T5, V6, T8     | 8/14                              | 19/32                      | 14.7                             | No rev                              | 2/25                                  | 3/55                       | 27.8                             | 34.2                                |
| AADTGHSNQ                | A1, G5, N6, S7, S8, Q9 | HLA restriction not defined       |                            |                                  |                                     |                                       |                            |                                  |                                     |
| HSNQVSNYP                | N1, S2, S3, Q4, V5     | HLA restriction not defined       |                            |                                  |                                     |                                       |                            |                                  |                                     |
| ISPRTLNAW                | A(-1), I1              | 6/8                               | 21/39                      | 1.75                             | No rev                              | 3/5                                   | 4/75                       | 1.92                             | 37.7                                |
| KAFSPEVIPMF              | A2                     | 0/10                              | 5/66                       | >50                              | No rev                              | 1/9                                   | 0/6                        | 16.0                             | No rev                              |
| EVIPMFSAL                | E1, S7                 | 1/4                               | 16/72                      | 16.6                             | No rev                              | 1/4                                   | 0/43                       | 6.75                             | No rev                              |
| TSTLQEQIGW               | T3                     | 10/15                             | 4/61                       | 2.04                             | 3.78                                | 4/6                                   | 7/12                       | 1.56                             | 2.50                                |
| KRWIILGLNK               | R2                     | 3/9                               | 3/67                       | 8.28                             | 7.37                                | 3/17                                  | 1/9                        | 11.1                             | 14.5                                |
| NANPDCKTI                | A2, T8                 | 2/11                              | 13/65                      | 29.6                             | No rev                              | 0/9                                   | 2/30                       | No esc                           | 29.8                                |
| DCKTILKAL                | K3                     | 2/14                              | 1/62                       | 26.3                             | 3.00                                | 0/35                                  | 0/1                        | No esc                           | No rev                              |
| CGKEGHTAR                | R9                     | No sequence                       |                            |                                  |                                     | No sequence                           |                            |                                  |                                     |
| GPVKVQWPL                | K3                     | 1/8                               | 4/45                       | 48.5                             | No rev                              | 0/12                                  | 0/8                        | No esc                           | No rev                              |
| TAFTIPSI                 | I8                     | 7/8                               | 20/55                      | 0.93                             | 25.2                                | 1/1                                   | 2/28                       | 0.50                             | 24.6                                |
| AIFQSSMTK                | A1, F3, Q4             | 2/22                              | 1/41                       | >50                              | 3.66                                | 0/22                                  | 0/2                        | No esc                           | No rev                              |
| IVLPEKDSW                | V2, D7                 | 4/6                               | 19/55                      | 2.58                             | No rev                              | 1/1                                   | 0/30                       | 0.50                             | No rev                              |
| IPLTEEAEL                | E5                     | No sequence                       |                            |                                  |                                     | 0/1                                   | 1/21                       | No esc                           | 37.5                                |
| ETFYVDGAANR              | F3, D6                 | 0/3                               | 0/71                       | No esc                           | Indeterminate                       | No sequence                           |                            |                                  |                                     |
| QVPLRPMTYK               | V2, L4, R5, M7, T8     | 0/13                              | 2/38                       | >50                              | No rev                              | 2/21                                  | 5/11                       | 18.4                             | 1.85                                |
| VPLRPMTY                 | T7, Y8                 | 3/7                               | 2/44                       | 6.18                             | 2.02                                | 3/9                                   | 4/18                       | 4.50                             | 6.00                                |
| RPMTYKAAV                | T4, Y5                 | 1/5                               | 4/46                       | 26.2                             | 25.2                                | 2/18                                  | 2/16                       | 16.4                             | 12.4                                |
| KAADVLSHF                | A2                     | 4/8                               | 21/43                      | 6.25                             | No rev                              | 1/2                                   | 7/58                       | 3.50                             | 14.0                                |
| FLKEGGGL                 | L2, K3, E4, K5         | 4/8                               | 12/43                      | 7.83                             | No rev                              | -/0                                   | 0/88                       | Indeterminate                    | No rev                              |
| HTQGYFPDW                | H1                     | 6/6                               | 11/45                      | 0.00                             | 27.7                                | 2/5                                   | 0/32                       | 2.25                             | No rev                              |
| TPGPGVRYPL               | P2                     | 0/5                               | 1/46                       | >50                              | No rev                              | 1/22                                  | 1/5                        | 34.5                             | 9.00                                |
| RYPLTFGWCY               | Y2                     | 12/14                             | 7/37                       | 0.89                             | 4.83                                | 5/11                                  | 5/18                       | 1.85                             | 6.65                                |
| SRLAFHHVAR               | R10                    | No sequence                       |                            |                                  |                                     | 1/3                                   | 4/45                       | 3.50                             | 14.7                                |

**Table S2. A summary of escape and reversion data from the cross-sectional study (dataset 2) and the longitudinal cohort study (dataset 4).**

This is a summary of escape and reversion data relating to 31 epitopes with described escape mutants in HIV-1 gag, RT and nef. Sequence data from other HIV genes were not yet available from either of these studies. These are the same epitopes (in the same order) as provided in Table S1. In this analysis any mutation in any of the previously defined escape sites within an epitope (Table S1) was counted as an escape mutant. The prevalence of escape in HLA matched and HLA mismatched hosts in the cross-sectional data are provided here in columns 3 and 4 and also in Fig. 2B. Escape and reversion rates estimated from these data using the mathematical model are presented in columns 5-8. Model estimates assume that  $\beta c = 0.3$  (i.e.  $R_0 = 3$  if  $\mu + \alpha = 0.1$ ), that the epidemic duration is 27 years ( $t=27$ ) and that the proportion of hosts in the population with each HLA is as presented in Table S1. The escape rate estimates in columns 5 and 9 are compared in Fig. 3A. Likewise, the reversion rate estimates in columns 6 and 10 are compared in Fig. 3B.
